# Supplementary material for: Electroless deposition of Ni–P/Au coating on Cu substrate with improved corrosion resistance from Au(iii)–DMH based cyanide-free plating bath using hypophosphite as a reducing agent
Source: PubMed Central journal article supplement — RSC Adv. 2021 Dec 8;11(62):39153–68. doi: 10.1039/d1ra07952b (PMC9044480; doi:10.1039/d1ra07952b), 2021-12-08
Supplement: RA-011-D1RA07952B-s001.pdf [file RA-011-D1RA07952B-s001.pdf]

## Supplementary Information

### **Electroless deposition of Ni-P/Au coating on Cu substrate with improved corrosion resistance from Au(III)-DMH based cyanide-free plating bath using hypophosphite as a reducing agent**

Bo Wu,<sup>a</sup> Baizhao Tan,<sup>a</sup> Guizhen Tan,<sup>a</sup> Ming Zeng,<sup>a</sup> Jinyi Luo,<sup>a</sup> Guanghui Hu,<sup>a</sup> Jiye Luo,<sup>a</sup> Zhifeng Hao,<sup>\*a</sup> Shaomei Lai<sup>b</sup> and Binyun Liu<sup>\*b</sup>

<sup>a</sup> *Guangdong Provincial Key Laboratory of Plant Resources Biorefinery, School of Chemical Engineering and Light Industry, Guangdong University of Technology, Guangzhou 510006, China*

<sup>b</sup> *Guangdong Toneset Science & Technology Co., Ltd., Guangzhou 511400, China*

\* Correspondence to: haozf@gdut.edu.cn (Zhifeng Hao)  
beston@ghotech.com (Binyun Liu)

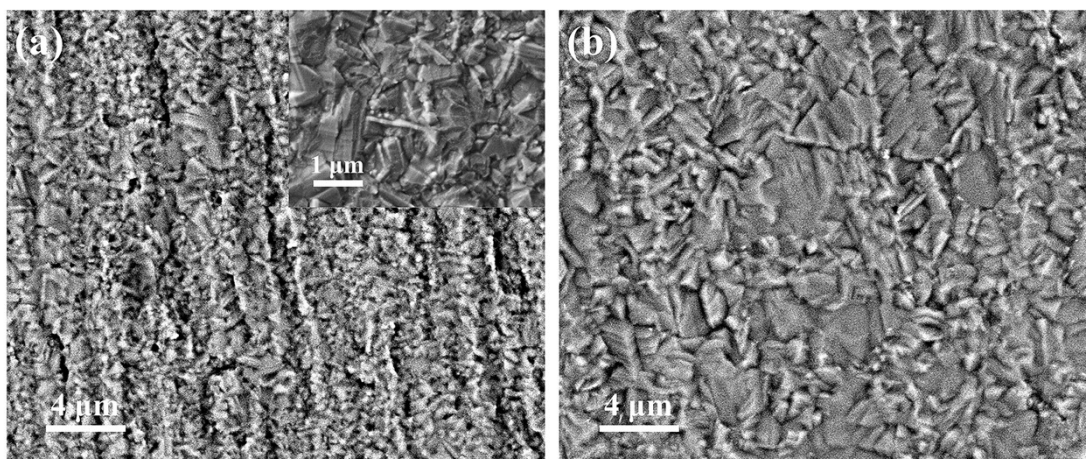

**Fig. S1** SEM images of the copper sheets: (a) without pretreatment and (b) after soaking in a mixed solution of 5 wt.% sulfuric acid and  $60 \text{ g L}^{-1} \text{ Na}_2\text{S}_2\text{O}_8$

It can be seen from Fig. S1 that the copper particles without pretreatment are tiny. After the treatment of the mixed solution consisting of 5 wt.% sulfuric acid and  $60 \text{ g L}^{-1} \text{ Na}_2\text{S}_2\text{O}_8$ , the copper surface becomes rough. This rough structure will help to improve the adhesion between Cu substrate and Ni-P layer.

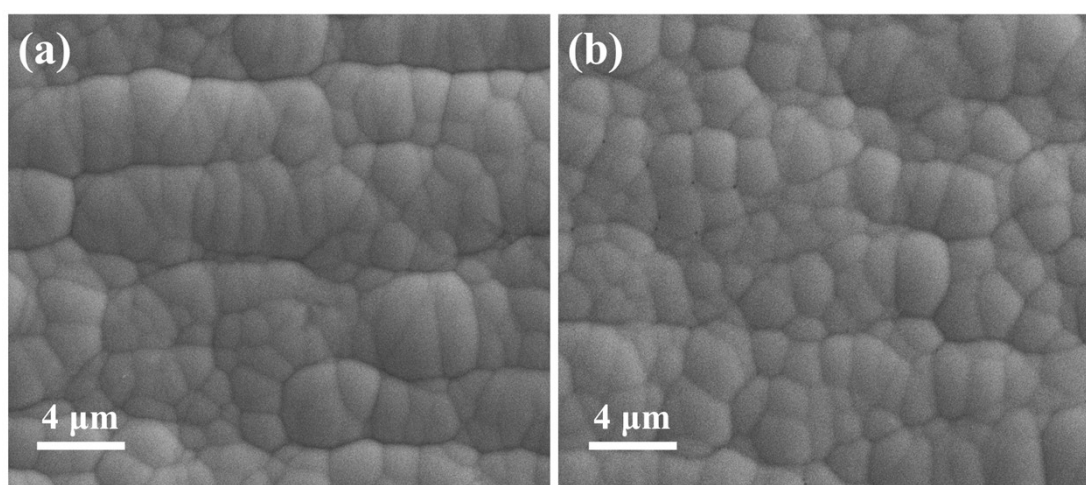

**Fig. S2** SEM images of the Ni-P layers (a) before and (b) after the stripping process

**Table S1** Reaction time for depositing  $0.05 \text{ μm}$  Au layer in plating bath containing different concentrations of  $\text{NaH}_2\text{PO}_2$

| $\text{NaH}_2\text{PO}_2$ concentration / $\text{g L}^{-1}$ | Reaction time / min |
|-------------------------------------------------------------|---------------------|
| 0                                                           | 15                  |
| 2.5                                                         | 13                  |
| 5.0                                                         | 11                  |
| 7.5                                                         | 9                   |
| 10.0                                                        | 8                   |

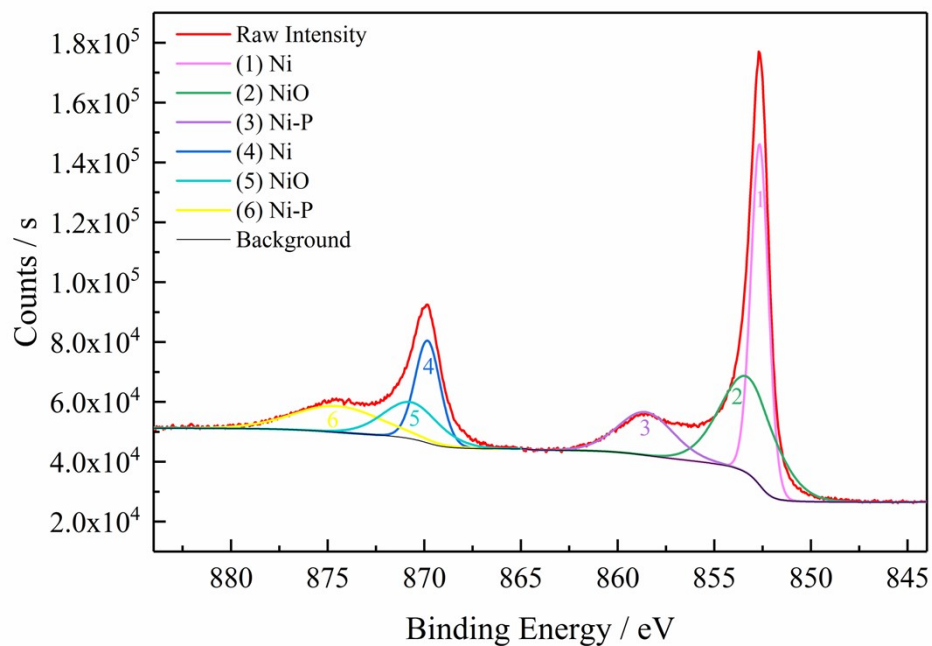

**Fig. S3** Fitted high-resolution Ni 2p spectrum after etch 150 nm.

**Table S2** Elemental contents of Au, Ni, P, and O obtained from depth profiles

| Etch depth / nm | Au / at.% | Ni / at.% | P / at.% | O / at.% |
|-----------------|-----------|-----------|----------|----------|
| 10              | 100       | 0         | 0        | 0        |
| 20              | 100       | 0         | 0        | 0        |
| 30              | 100       | 0         | 0        | 0        |
| 40              | 100       | 0         | 0        | 0        |
| 50              | 93.71     | 5.71      | 0.59     | 0        |
| 60              | 71.28     | 22.34     | 5.90     | 0.48     |
| 70              | 44.28     | 45.56     | 9.49     | 0.67     |
| 80              | 26.85     | 59.47     | 11.93    | 1.75     |
| 90              | 17.07     | 68.09     | 12.48    | 2.36     |
| 100             | 11.89     | 72.17     | 13.24    | 2.71     |
| 110             | 8.56      | 74.56     | 12.59    | 3.29     |
| 120             | 6.52      | 77.02     | 12.53    | 3.93     |
| 130             | 4.95      | 78.82     | 12.12    | 4.11     |
| 140             | 4.24      | 79.11     | 12.33    | 4.32     |
| 150             | 3.81      | 79.97     | 12.24    | 4.23     |

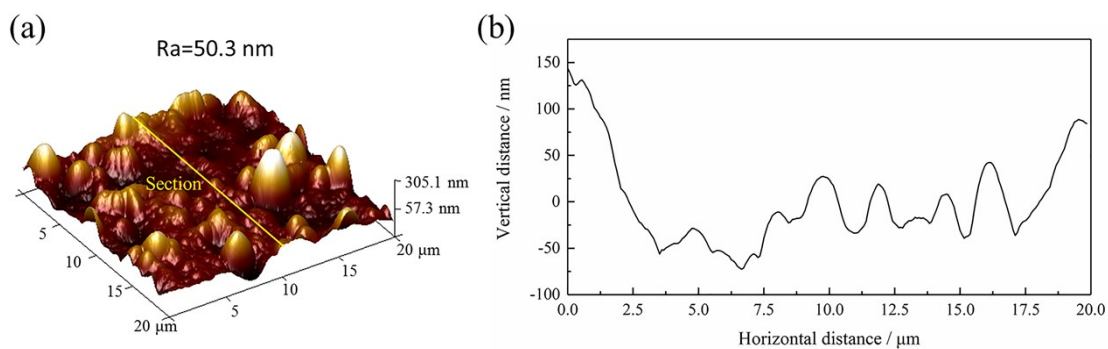

**Fig. S4** (a) AFM image of the Ni-P layer and (b) the sectional analysis of AFM image.

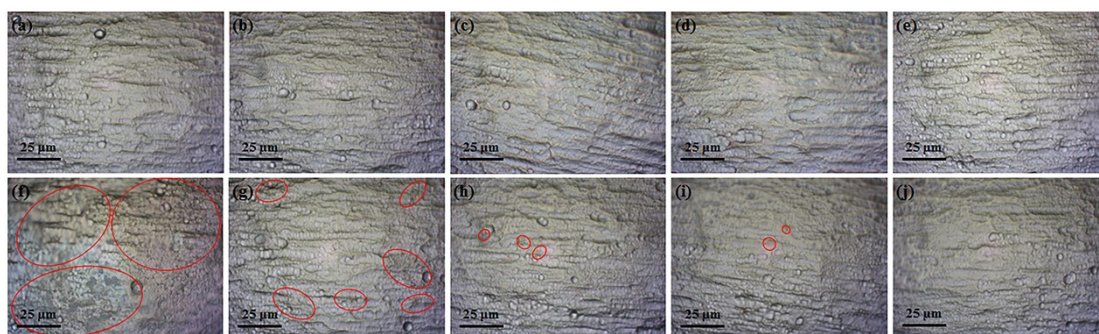

**Fig. S5** Optical microscope images of the Au layers before (a-e) and after (f-j) salt spray tests. The Au layers were deposited from cyanide-free bath containing different concentration of  $\text{NaH}_2\text{PO}_2$ : (a, f)  $0\text{ g L}^{-1}$ , (b, g)  $2.5\text{ g L}^{-1}$ , (c, h)  $5.0\text{ g L}^{-1}$ , (d, i)  $7.5\text{ g L}^{-1}$ , and (e, j)  $10\text{ g L}^{-1}$ .

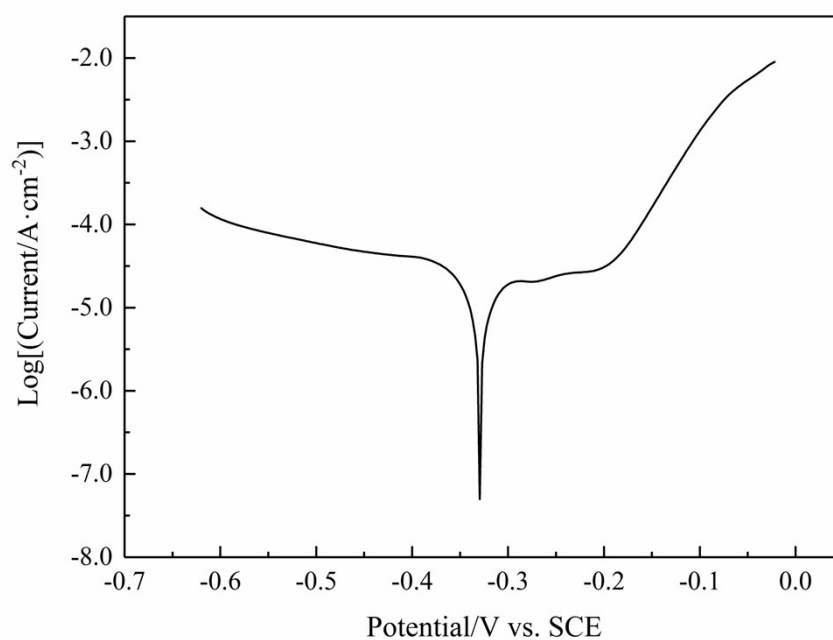

**Fig. S6** The PDP curve of Cu substrate in a 3.5 wt.% NaCl solution.

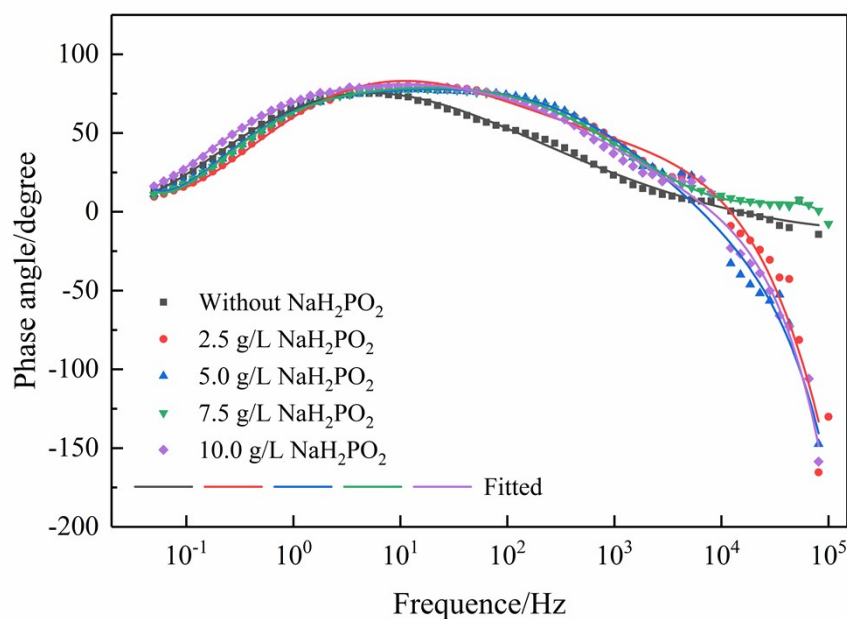

**Fig. S7** Bode phase plots of the coatings in a 3.5 wt.% NaCl solution.

**Table S3** Electrochemical parameters for EIS tests in a 3.5 wt.% NaCl solution

| Concentration of $\text{NaH}_2\text{PO}_2$ ( $\text{g L}^{-1}$ ) | $R_s$ ( $\Omega \text{ cm}^{-2}$ ) | $R_{\text{coat}}$ ( $\Omega \text{ cm}^{-2}$ ) | $\text{CPE}_{\text{coat}}$      |       | $\text{CPE}_{\text{dl}}$        |       |
|------------------------------------------------------------------|------------------------------------|------------------------------------------------|---------------------------------|-------|---------------------------------|-------|
|                                                                  |                                    |                                                | $Y_0$ ( $\mu\text{F cm}^{-2}$ ) | $n$   | $Y_0$ ( $\mu\text{F cm}^{-2}$ ) | $n$   |
| 0                                                                | 6.21                               | 22.44                                          | 12.29                           | 0.897 | 18.42                           | 0.876 |
| 2.5                                                              | 5.53                               | 60.27                                          | 8.77                            | 0.932 | 3.15                            | 0.891 |
| 5.0                                                              | 6.66                               | 112.7                                          | 7.39                            | 0.966 | 6.81                            | 0.784 |
| 7.5                                                              | 6.51                               | 80.85                                          | 10.92                           | 0.911 | 1.75                            | 0.825 |
| 10.0                                                             | 6.22                               | 310.17                                         | 15.38                           | 0.927 | 2.35                            | 0.792 |

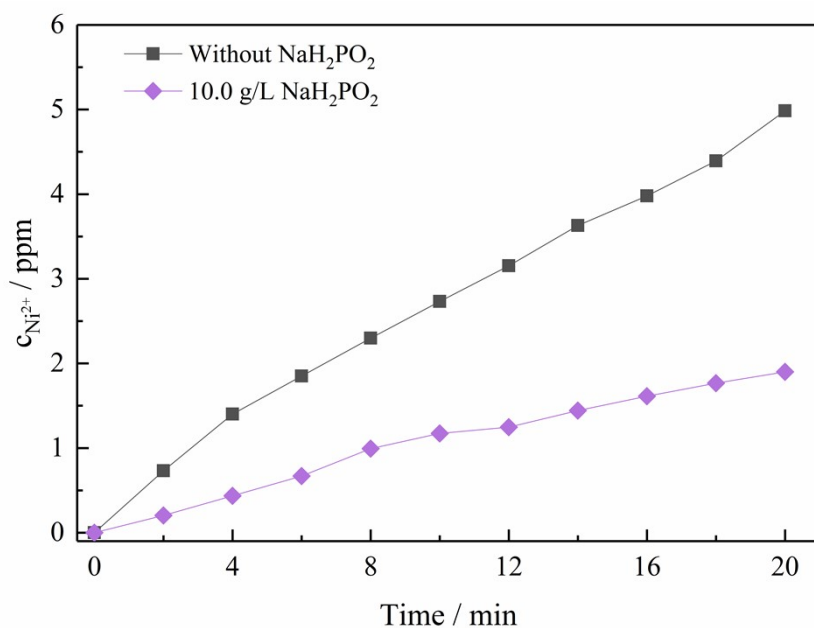

**Fig. S8** The concentrations of the generated nickel ions vary with the reaction time.

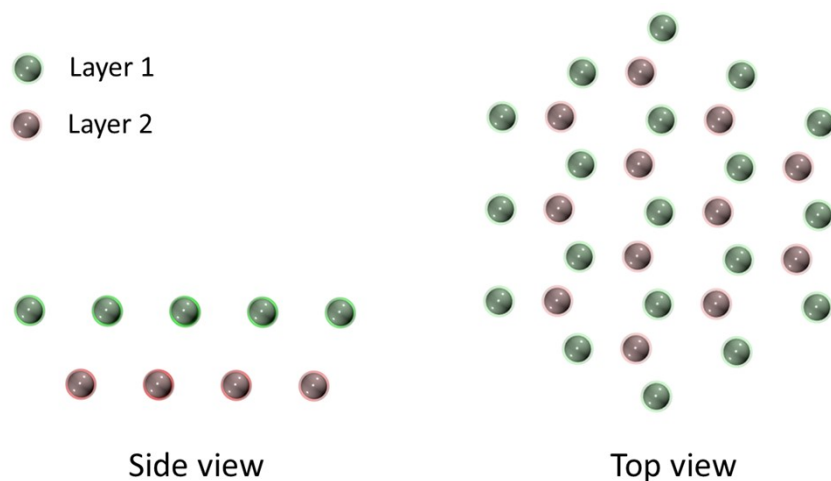

**Fig. S9** Side view and top view of the cluster.

Cluster models were often used to simulate metal surfaces.<sup>1-6</sup> XRD analysis has revealed that the Au(111) was the preferential orientation, so the (111) facet was constructed.

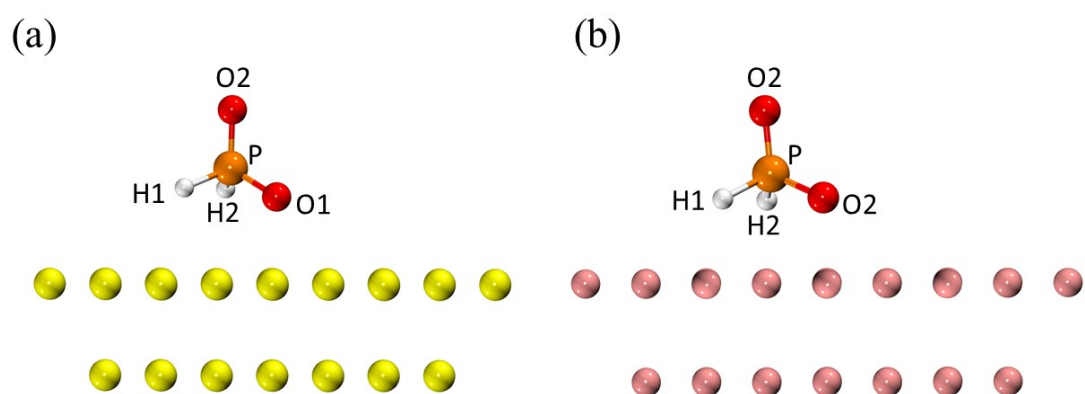

**Fig. S10** Side view for the structures of hypophosphite adsorbed on Au<sub>31</sub> cluster (a) and Cu<sub>31</sub> cluster (b). White: H, orange: P, yellow: Au, pink: Cu.

**Table S4** Bond length and bond angle parameters of hypophosphite adsorbed on Au<sub>31</sub> and Cu<sub>31</sub> cluster

| Parameters           | H <sub>2</sub> PO <sub>2</sub> <sup>-</sup> -Au <sub>31</sub> | H <sub>2</sub> PO <sub>2</sub> <sup>-</sup> -Cu <sub>31</sub> |
|----------------------|---------------------------------------------------------------|---------------------------------------------------------------|
| <i>r</i> (P-O1)/Å    | 1.554                                                         | 1.541                                                         |
| <i>r</i> (P-O2)/Å    | 1.508                                                         | 1.510                                                         |
| <i>r</i> (P-H1)/Å    | 1.438                                                         | 1.453                                                         |
| <i>r</i> (P-H2)/Å    | 1.439                                                         | 1.455                                                         |
| $\theta$ (O1-P-O2)/° | 116.988                                                       | 118.539                                                       |
| $\theta$ (H1-P-O2)/° | 112.034                                                       | 111.581                                                       |
| $\theta$ (H2-P-O2)/° | 111.996                                                       | 111.233                                                       |
| $\theta$ (O1-P-H2)/° | 106.873                                                       | 107.116                                                       |
| $\theta$ (O1-P-H1)/° | 106.939                                                       | 106.989                                                       |
| $\theta$ (H1-P-H2)/° | 100.593                                                       | 99.603                                                        |

## References

- 1 T. Homma, I. Komatsu, A. Tamaki, H. Nakai and T. Osaka, *Electrochim. Acta*, 2001, **47**, 47-53.
- 2 T. Shimada, K. Sakata, T. Homma, H. Nakai and T. Osaka, *Electrochim. Acta*, 2005, **51**, 906-915.
- 3 M. Kunimoto, T. Shimada, S. Odagiri, H. Nakai and T. Homma, *J. Electrochem. Soc.*, 2011, **158**, D585.
- 4 M. Kunimoto, K. Seki, H. Nakai and T. Homma, *Electrochemistry*, 2012, **80**, 222-225.
- 5 M. Kunimoto, K. Endo, H. Nakai and T. Homma, *Electrochim. Acta*, 2013, **100**, 311-316.
- 6 S.S. Starodubov, I.V. Nechaev and A.V. Vvedenskii, *Russ. J. Phys. Chem. A*, 2016, **90**, 122-129.
